# Supplementary material for: Pervasive and Persistent Redundancy among Duplicated Genes in Yeast
Source: PubMed Central journal article supplement (PMC2440806; doi:10.1371/journal.pgen.1000113), 2008-07-04
Supplement: pgen.1000113.s004.pdf [file pgen.1000113.s004.pdf]

| ORF1      | ORF2      | ORF1_fit | ORF2_fit | ORF1ORF2_fit |
|-----------|-----------|----------|----------|--------------|
| YMR205C   | YGR240C   | 0.36     | 0.86     | 0            |
| YHR183W   | YGR256W   | 0.39     | 0.97     | 0            |
| YPL249C-A | YMR194W   | 0.46     | 0.78     | 0            |
| YKL006W   | YHL001W   | 0.46     | 0.90     | 0            |
| YGR162W   | YGL049C   | 0.46     | 1.00     | 0            |
| YER117W   | YBL087C   | 0.52     | 0.79     | 0            |
| YGL189C   | YER131W   | 0.53     | 0.90     | 0            |
| YPR043W   | YJR094W-A | 0.53     | 0.87     | 0            |
| YOR293W   | YMR230W   | 0.54     | 0.75     | 0            |
| YOR096W   | YNL096C   | 0.56     | 0.90     | 0            |
| YOL115W   | YNL299W   | 0.59     | 1.00     | 0            |
| YML024W   | YDR447C   | 0.61     | 0.83     | 0            |
| YML063W   | YLR441C   | 0.65     | 0.87     | 0            |
| YJR145C   | YHR203C   | 0.66     | 0.76     | 0            |
| YPL090C   | YBR181C   | 0.67     | 0.73     | 0            |
| YPR159W   | YGR143W   | 0.67     | 1.00     | 0            |
| YLR185W   | YDR500C   | 0.68     | 0.81     | 0            |
| YML073C   | YLR448W   | 0.69     | 0.77     | 0            |
| YNL162W   | YHR141C   | 0.70     | 0.62     | 0            |
| YBR084C-A | YBL027W   | 0.73     | 0.55     | 0            |
| YOR182C   | YLR287C-A | 0.75     | 0.83     | 0            |
| YOL121C   | YNL302C   | 0.76     | 0.64     | 0            |
| YKR057W   | YJL136C   | 0.78     | 0.61     | 0            |
| YML026C   | YDR450W   | 0.79     | 0.71     | 0            |
| YLR388W   | YDL061C   | 0.80     | 0.74     | 0            |
| YHR066W   | YDR312W   | 0.84     | 1.00     | 0            |
| YER102W   | YBL072C   | 0.85     | 0.64     | 0            |
| YIL069C   | YER074W   | 0.88     | 0.44     | 0            |
| YNL055C   | YIL114C   | 0.89     | 1.01     | 0            |
| YOR167C   | YLR264W   | 0.90     | 0.77     | 0            |
| YLR367W   | YJL190C   | 0.90     | 0.69     | 0            |
| YMR238W   | YKL046C   | 0.94     | 0.99     | 0            |
| YKL008C   | YHL003C   | 0.95     | 0.95     | 0            |
| YPL220W   | YGL135W   | 0.95     | 0.53     | 0            |
| YIL138C   | YNL079C   | 0.95     | 0.41     | 0            |
| YLR180W   | YDR502C   | 0.96     | 1.03     | 0            |
| YKL156W   | YHR021C   | 0.96     | 0.95     | 0            |
| YJR103W   | YBL039C   | 0.97     | 0.81     | 0            |
| YPL240C   | YMR186W   | 0.98     | 1.00     | 0            |
| YJL191W   | YCR031C   | 0.98     | 0.88     | 0            |
| YER105C   | YBL079W   | 0.99     | 0.50     | 0            |
| YLR328W   | YGR010W   | 0.99     | 1.00     | 0            |
| YNL030W   | YBR009C   | 1.00     | 0.98     | 0            |
| YKR067W   | YBL011W   | 1.00     | 0.96     | 0            |
| YER177W   | YDR099W   | 1.01     | 1.02     | 0            |
| YIL066C   | YER070W   | 1.01     | 0.55     | 0            |

|         |           |      |      |      |
|---------|-----------|------|------|------|
| YDR012W | YBR031W   | 1.01 | 0.81 | 0    |
| YJR148W | YHR208W   | 1.02 | 0.89 | 0    |
| YPL135W | YOR226C   | 1.02 | 1.02 | 0    |
| YHR033W | YDR300C   | 0.96 | 0.44 | 0.22 |
| YOR295W | YMR233W   | 0.29 | 1.01 | 0.26 |
| YEL054C | YDR418W   | 0.69 | 0.53 | 0.26 |
| YNR027W | YEL029C   | 1.01 | 0.24 | 0.30 |
| YEL042W | YER005W   | 0.97 | 1.00 | 0.43 |
| YCL057W | YKL134C   | 1.05 | 0.53 | 0.46 |
| YPR032W | YBL106C   | 0.95 | 0.99 | 0.53 |
| YKR018C | YJL082W   | 1.00 | 0.99 | 0.54 |
| YIR021W | YKL011C   | 0.71 | 0.98 | 0.57 |
| YLR061W | YFL034C-A | 0.66 | 1.00 | 0.63 |
| YML061C | YHR031C   | 0.94 | 0.97 | 0.64 |
| YOR270C | YMR054W   | 0.91 | 0.98 | 0.67 |
| YPL152W | YIL153W   | 0.94 | 0.96 | 0.69 |
| YIL052C | YER056C-A | 0.94 | 0.72 | 0.69 |
| YKR050W | YJL129C   | 0.94 | 0.96 | 0.72 |
| YPL189W | YGL084C   | 0.95 | 0.76 | 0.74 |
| YHR010W | YDR471W   | 0.95 | 0.87 | 0.76 |
| YLR350W | YGR038W   | 1.01 | 1.00 | 0.77 |
| YLR333C | YGR027C   | 0.97 | 0.92 | 0.78 |
| YGR155W | YGR012W   | 0.76 | 0.93 | 0.78 |
| YGL054C | YBR210W   | 0.96 | 1.01 | 0.80 |
| YLR130C | YGL255W   | 0.93 | 0.96 | 0.81 |
| YNL197C | YDL224C   | 0.96 | 1.01 | 0.83 |
| YHR097C | YDR348C   | 0.99 | 0.91 | 0.85 |
| YCL051W | YDR528W   | 0.91 | 0.99 | 0.87 |
| YPL037C | YDR252W   | 0.93 | 0.96 | 0.87 |
| YKL087C | YAL039C   | 0.94 | 0.88 | 0.87 |
| YMR153W | YDL088C   | 0.94 | 0.93 | 0.87 |
| YJR048W | YEL039C   | 0.95 | 0.99 | 0.88 |
| YBR037C | YBR024W   | 0.89 | 1.01 | 0.89 |
| YMR120C | YLR028C   | 1.03 | 1.08 | 0.90 |
| YIL135C | YNL074C   | 0.97 | 0.96 | 0.90 |
| YNL130C | YHR123W   | 1.00 | 1.00 | 0.91 |
| YJR133W | YDR399W   | 0.95 | 0.93 | 0.91 |
| YHR108W | YDR358W   | 0.98 | 1.03 | 0.91 |
| YLR406C | YDL075W   | 0.93 | 1.01 | 0.91 |
| YLR324W | YGR004W   | 0.92 | 0.98 | 0.91 |
| YER139C | YDR066C   | 0.86 | 1.00 | 0.91 |
| YLR344W | YGR034W   | 0.95 | 0.94 | 0.92 |
| YML022W | YDR441C   | 0.92 | 0.93 | 0.92 |
| YHR061C | YDR309C   | 1.02 | 1.00 | 0.92 |
| YJL137C | YKR058W   | 0.96 | 0.94 | 0.92 |
| YGL133W | YPL216W   | 0.92 | 0.99 | 0.92 |
| YDR035W | YBR249C   | 0.98 | 0.97 | 0.93 |

|           |           |      |      |      |
|-----------|-----------|------|------|------|
| YLR177W   | YDR505C   | 1.00 | 0.97 | 0.93 |
| YGR066C   | YBR105C   | 0.97 | 0.96 | 0.94 |
| YOR338W   | YAL034C   | 0.96 | 0.96 | 0.94 |
| YNL117W   | YIR031C   | 0.94 | 0.99 | 0.94 |
| YHR204W   | YJR131W   | 1.00 | 0.98 | 0.94 |
| YPR069C   | YLR146C   | 0.98 | 0.99 | 0.94 |
| YEL017C-A | YCR024C-A | 1.00 | 0.92 | 0.94 |
| YPL060W   | YOR334W   | 0.94 | 0.95 | 0.95 |
| YNL257C   | YHR155W   | 0.97 | 0.99 | 0.95 |
| YDL204W   | YDR233C   | 1.00 | 0.99 | 0.95 |
| YMR310C   | YGR283C   | 0.97 | 0.99 | 0.95 |
| YGL222C   | YER035W   | 0.94 | 0.97 | 0.95 |
| YHR103W   | YDR351W   | 1.00 | 0.97 | 0.95 |
| YIL056W   | YER064C   | 0.98 | 0.98 | 0.95 |
| YOR173W   | YLR270W   | 0.96 | 0.97 | 0.95 |
| YGR184C   | YLR024C   | 1.00 | 0.95 | 0.95 |
| YDR001C   | YBR001C   | 0.98 | 0.99 | 0.95 |
| YGL019W   | YOR039W   | 0.97 | 0.92 | 0.96 |
| YPR074C   | YBR117C   | 0.96 | 1.00 | 0.96 |
| YKR053C   | YJL134W   | 1.04 | 0.99 | 0.96 |
| YLR183C   | YDR501W   | 0.97 | 0.98 | 0.96 |
| YJL181W   | YJR030C   | 0.97 | 0.97 | 0.96 |
| YJL058C   | YBR270C   | 1.00 | 0.99 | 0.96 |
| YDR214W   | YNL281W   | 0.97 | 0.96 | 0.96 |
| YPL023C   | YGL125W   | 1.00 | 1.00 | 0.96 |
| YER145C   | YBR207W   | 0.93 | 0.90 | 0.96 |
| YKL050C   | YMR031C   | 1.00 | 1.01 | 0.97 |
| YPR194C   | YJL212C   | 1.00 | 0.99 | 0.97 |
| YDR206W   | YLR233C   | 1.01 | 1.01 | 0.97 |
| YGR035C   | YLR346C   | 0.97 | 0.94 | 0.97 |
| YOL043C   | YAL015C   | 0.98 | 0.97 | 0.97 |
| YKL039W   | YHL017W   | 0.99 | 1.00 | 0.97 |
| YGR204W   | YBR084W   | 0.95 | 1.00 | 0.97 |
| YDL181W   | YDL130W-A | 1.08 | 1.02 | 0.97 |
| YDR003W   | YBR005W   | 1.01 | 0.99 | 0.97 |
| YDR530C   | YCL050C   | 0.97 | 0.97 | 0.97 |
| YJR015W   | YGR197C   | 0.98 | 0.98 | 0.97 |
| YOR180C   | YLR284C   | 0.95 | 0.96 | 0.98 |
| YJR054W   | YML047C   | 1.01 | 1.02 | 0.98 |
| YMR206W   | YNR014W   | 0.98 | 0.98 | 0.98 |
| YPR172W   | YLR456W   | 0.97 | 0.97 | 0.98 |
| YFR039C   | YGL228W   | 1.00 | 0.97 | 0.98 |
| YMR115W   | YKL133C   | 1.01 | 1.01 | 0.98 |
| YOR312C   | YMR242C   | 0.99 | 0.99 | 0.98 |
| YOR307C   | YJL193W   | 0.97 | 0.99 | 0.98 |
| YLR133W   | YDR147W   | 1.03 | 1.02 | 0.98 |
| YMR053C   | YKL072W   | 0.98 | 0.98 | 0.98 |

|         |           |      |      |      |
|---------|-----------|------|------|------|
| YPL187W | YGL089C   | 0.99 | 0.97 | 0.98 |
| YDR018C | YBR042C   | 1.00 | 1.00 | 0.98 |
| YPL191C | YGL082W   | 0.99 | 1.01 | 0.98 |
| YPL212C | YGL063W   | 0.98 | 1.00 | 0.98 |
| YHL039W | YPL208W   | 1.00 | 1.00 | 0.98 |
| YOR040W | YDR272W   | 1.00 | 0.99 | 0.98 |
| YML070W | YFL053W   | 0.99 | 0.99 | 0.98 |
| YDR514C | YCL036W   | 0.98 | 0.99 | 0.98 |
| YKL103C | YHR113W   | 1.01 | 1.02 | 0.98 |
| YMR264W | YML101C   | 0.98 | 0.98 | 0.98 |
| YOL017W | YFR013W   | 0.97 | 1.03 | 0.98 |
| YBL059W | YER093C-A | 1.04 | 1.02 | 0.99 |
| YGR231C | YGR132C   | 1.00 | 0.99 | 0.99 |
| YLR354C | YGR043C   | 0.98 | 0.99 | 0.99 |
| YPL105C | YBR172C   | 0.93 | 0.97 | 0.99 |
| YDR273W | YOR042W   | 1.04 | 1.01 | 0.99 |
| YLR454W | YPR117W   | 1.01 | 1.00 | 0.99 |
| YOR047C | YDR277C   | 0.98 | 1.02 | 0.99 |
| YPL004C | YGR086C   | 0.99 | 0.96 | 0.99 |
| YDR009W | YBR020W   | 1.01 | 1.01 | 0.99 |
| YOR375C | YAL062W   | 0.98 | 0.98 | 0.99 |
| YNL145W | YDR461W   | 0.98 | 0.99 | 0.99 |
| YLR361C | YOR137C   | 1.02 | 0.99 | 0.99 |
| YDR503C | YDR284C   | 0.99 | 0.99 | 0.99 |
| YGR088W | YDR256C   | 1.01 | 0.98 | 0.99 |
| YMR295C | YGR273C   | 0.98 | 0.99 | 0.99 |
| YDR458C | YML034W   | 1.00 | 0.97 | 0.99 |
| YJR116W | YPR114W   | 0.98 | 1.00 | 0.99 |
| YKL093W | YMR081C   | 1.01 | 1.03 | 0.99 |
| YGR142W | YPR158W   | 1.01 | 1.01 | 0.99 |
| YAL028W | YOR324C   | 1.00 | 0.98 | 0.99 |
| YLR136C | YDR151C   | 0.98 | 1.02 | 0.99 |
| YEL016C | YCR026C   | 0.98 | 0.98 | 0.99 |
| YBR197C | YPL077C   | 1.00 | 0.99 | 0.99 |
| YOR171C | YLR260W   | 0.98 | 0.99 | 0.99 |
| YIL057C | YER067W   | 0.93 | 0.95 | 1.00 |
| YPR006C | YER065C   | 1.03 | 1.02 | 1.00 |
| YLR080W | YFL048C   | 0.99 | 0.98 | 1.00 |
| YGL162W | YPR009W   | 0.99 | 0.98 | 1.00 |
| YGL060W | YBR216C   | 0.99 | 0.98 | 1.00 |
| YLR058C | YBR263W   | 1.02 | 1.01 | 1.00 |
| YBR273C | YJL048C   | 0.97 | 0.98 | 1.00 |
| YOR377W | YGR177C   | 0.98 | 1.01 | 1.00 |
| YML075C | YLR450W   | 1.01 | 1.03 | 1.00 |
| YMR271C | YML106W   | 1.00 | 1.02 | 1.01 |
| YLR258W | YFR015C   | 0.98 | 1.01 | 1.01 |
| YNR019W | YCR048W   | 1.00 | 1.01 | 1.01 |

|         |           |      |      |      |
|---------|-----------|------|------|------|
| YNL156C | YHR133C   | 0.98 | 1.02 | 1.01 |
| YPR157W | YGR141W   | 1.01 | 0.98 | 1.01 |
| YPR193C | YEL066W   | 0.97 | 1.01 | 1.01 |
| YGL056C | YBR214W   | 1.02 | 1.02 | 1.01 |
| YDR109C | YNL249C   | 1.01 | 1.02 | 1.01 |
| YPL250C | YMR195W   | 1.03 | 1.04 | 1.01 |
| YAL037W | YOR342C   | 1.00 | 0.98 | 1.01 |
| YPL130W | YOR214C   | 0.98 | 0.93 | 1.02 |
| YLR108C | YDR132C   | 1.01 | 1.02 | 1.02 |
| YLR327C | YGR008C   | 1.04 | 1.03 | 1.02 |
| YPL087W | YBR183W   | 1.07 | 1.00 | 1.02 |
| YOR219C | YHR028C   | 1.01 | 1.04 | 1.03 |
| YOR371C | YAL056W   | 1.03 | 1.03 | 1.04 |
| YGR230W | YHR152W   | 1.00 | 1.03 | 1.07 |
| YMR118C | YKL141W   |      |      |      |
| YKL180W | YJL177W   |      |      |      |
| YJL026W | YGR180C   |      |      |      |
| YDR224C | YBL002W   |      |      |      |
| YOR110W | YNL108C   |      |      |      |
| YPL028W | YIL160C   |      |      |      |
| YJL174W | YDL049C   |      |      |      |
| YML065W | YLR442C   |      |      |      |
| YMR267W | YBR011C   |      |      |      |
| YOR347C | YAL038W   |      |      |      |
| YMR101C | YBR002C   |      |      |      |
| YPR081C | YBR121C   |      |      |      |
| YIL003W | YGL091C   |      |      |      |
| YJL031C | YKL019W   |      |      |      |
| YHR088W | YNL075W   |      |      |      |
| YCR052W | YNR023W   |      |      |      |
| YPL143W | YOR234C   |      |      |      |
| YOL120C | YNL301C   |      |      |      |
| YIL106W | YFL034C-B |      |      |      |
| YOR048C | YGL173C   |      |      |      |
| YDL164C | YOR005C   |      |      |      |
| YGR029W | YPR037C   |      |      |      |
| YER171W | YPL008W   |      |      |      |
| YLR008C | YNL328C   |      |      |      |
| YLR457C | YPR174C   |      |      |      |
| YHR091C | YDR341C   |      |      |      |
| YJR047C | YEL034W   |      |      |      |
| YMR121C | YLR029C   |      |      |      |
| YHR011W | YDR023W   |      |      |      |
| YDR072C | YKL004W   |      |      |      |
| YDL104C | YKR038C   |      |      |      |
| YMR180C | YPL228W   |      |      |      |
| YMR142C | YDL082W   |      |      |      |

|           |           |
|-----------|-----------|
| YDL191W   | YDL136W   |
| YPR102C   | YGR085C   |
| YHR132W-A | YNL157W   |
| YMR119W   | YNL008C   |
| YGR071C   | YLR373C   |
| YGR049W   | YLR356W   |
| YBL091C-A | YER120W   |
| YHR146W   | YNL173C   |
| YJL083W   | YKR019C   |
| YDR379W   | YOR127W   |
| YBL101C   | YPR030W   |
| YIR033W   | YKL020C   |
| YDR515W   | YCL037C   |
| YDL175C   | YIL079C   |
| YLR371W   | YGR070W   |
| YJR005C-A | YGR169C-A |
| YPL256C   | YMR199W   |
| YBL009W   | YGL021W   |
| YPL079W   | YBR191W   |
| YGL224C   | YER037W   |
| YDR025W   | YBR048W   |
| YOL059W   | YDL022W   |
| YPL171C   | YHR179W   |
| YHR005C   | YER020W   |
| YHR199C   | YHR198C   |
| YCL026C-B | YCL026C-A |
| YNL335W   | YFL061W   |
| YOR387C   | YGL258W   |
| YJL038C   | YJL037W   |
| YPL279C   | YOR390W   |
| YGL012W   | YNL280C   |
| YOL027C   | YPR125W   |
| YOL082W   | YOL083W   |
| YER087C-B | YER019C-A |
| YHR032W   | YDR338C   |
| YHR213W-B | YAR064W   |
| YOR072W-B | YOL013W-A |
| YOR147W   | YHR194W   |
| YIL038C   | YPR072W   |
| YER188C-A | YOL166W-A |
| YPL184C   | YML117W   |
| YLR027C   | YKL106W   |
| YLR308W   | YLR307W   |
| YOR286W   | YOR285W   |
| YBL043W   | YJR115W   |
| YPL112C   | YOR193W   |
| YMR181C   | YPL229W   |

|         |           |
|---------|-----------|
| YGL071W | YPL202C   |
| YIL158W | YKR100C   |
| YDL184C | YDL133C-A |
| YIR018W | YOL028C   |
| YKR091W | YOR083W   |
| YBR278W | YJL065C   |
| YHR160C | YGR239C   |
| YDR259C | YOR028C   |
