# Supplementary material for: Pervasive and Persistent Redundancy among Duplicated Genes in Yeast
Source: PubMed Central journal article supplement (PMC2440806; doi:10.1371/journal.pgen.1000113), 2008-07-04
Supplement: pgen.1000113.s005.pdf [file pgen.1000113.s005.pdf]

| ORF1      | ORF2    | ORF1_fit | ORF2_fit | ORF1ORF2_fit |
|-----------|---------|----------|----------|--------------|
| YPL097W   | YPL161C | 0.47     | 0.81     | 0.43         |
| YPR057W   | YBR200W | 0.77     | 0.50     | 0.49         |
| YPL148C   | YPR023C | 0.58     | 0.99     | 0.53         |
| YIL162W   | YNL139C | 0.99     | 0.56     | 0.54         |
| YER044C   | YOL147C | 0.64     | 0.94     | 0.54         |
| YCR020C-A | YGL246C | 1.03     | 0.60     | 0.59         |
| YML062C   | YFR036W | 0.78     | 0.90     | 0.60         |
| YDR392W   | YILO40W | 0.84     | 0.80     | 0.62         |
| YER141W   | YOR035C | 0.78     | 0.74     | 0.65         |
| YNL199C   | YJR043C | 0.76     | 0.95     | 0.72         |
| YKL119C   | YBR076W | 0.69     | 1.00     | 0.72         |
| YHR041C   | YJR053W | 0.72     | 0.96     | 0.72         |
| YBR035C   | YKL110C | 0.96     | 0.78     | 0.74         |
| YLR239C   | YDR176W | 0.71     | 0.80     | 0.77         |
| YGL066W   | YAL014C | 0.76     | 1.00     | 0.79         |
| YAR015W   | YMR039C | 0.97     | 0.88     | 0.82         |
| YNL294C   | YEL003W | 0.93     | 0.99     | 0.83         |
| YNL230C   | YJR117W | 0.94     | 0.93     | 0.85         |
| YGR063C   | YLL042C | 0.86     | 0.99     | 0.87         |
| YHR134W   | YLR421C | 0.89     | 0.96     | 0.88         |
| YOR017W   | YHR193C | 1.00     | 0.91     | 0.88         |
| YDR403W   | YGR229C | 0.99     | 0.91     | 0.90         |
| YDR456W   | YJL209W | 1.00     | 0.87     | 0.90         |
| YGR166W   | YFL007W | 0.93     | 0.97     | 0.90         |
| YDR354W   | YKL185W | 0.92     | 0.98     | 0.90         |
| YDR315C   | YLR368W | 1.01     | 0.94     | 0.90         |
| YEL053C   | YBR120C | 1.02     | 0.92     | 0.90         |
| YMR234W   | YNL070W | 1.00     | 0.95     | 0.91         |
| YER046W   | YEL062W | 0.99     | 0.94     | 0.91         |
| YOR243C   | YBR258C | 0.94     | 1.00     | 0.92         |
| YDR120C   | YLR176C | 0.98     | 0.99     | 0.92         |
| YFL013C   | YBR188C | 0.98     | 0.99     | 0.94         |
| YKR097W   | YPL003W | 1.00     | 1.00     | 0.94         |
| YAL055W   | YGR144W | 0.95     | 1.01     | 0.95         |
| YML006C   | YML095C | 0.96     | 0.96     | 0.95         |
| YLL060C   | YPR020W | 1.00     | 0.95     | 0.95         |
| YIL076W   | YLR267W | 0.94     | 0.96     | 0.95         |
| YCR075C   | YJL201W | 0.95     | 0.98     | 0.95         |
| YHR184W   | YHL016C | 0.97     | 0.99     | 0.96         |
| YGR236C   | YPL046C | 0.95     | 1.02     | 0.96         |
| YBR045C   | YJR082C | 1.01     | 1.00     | 0.96         |
| YBR201W   | YEL052W | 0.97     | 0.97     | 0.96         |
| YDR007W   | YHL006C | 0.97     | 1.02     | 0.96         |
| YIR032C   | YAL031C | 0.99     | 0.99     | 0.96         |
| YOR274W   | YPL127C | 0.98     | 0.99     | 0.96         |
| YJR069C   | YDL122W | 0.98     | 0.97     | 0.97         |

|           |         |      |      |      |
|-----------|---------|------|------|------|
| YNL159C   | YDR143C | 0.97 | 0.99 | 0.97 |
| YILO20C   | YMR302C | 0.99 | 0.98 | 0.97 |
| YMR274C   | YNL292W | 0.98 | 0.98 | 0.97 |
| YHR109W   | YIL065C | 0.99 | 0.98 | 0.97 |
| YER115C   | YLR390W | 0.98 | 1.01 | 0.97 |
| YDR158W   | YBR290W | 0.99 | 1.00 | 0.97 |
| YGR284C   | YLR363C | 0.99 | 1.00 | 0.97 |
| YDR110W   | YHR185C | 0.98 | 0.99 | 0.97 |
| YDL231C   | YPL192C | 1.00 | 1.00 | 0.97 |
| YOR265W   | YLR094C | 0.99 | 0.99 | 0.98 |
| YGL124C   | YER106W | 0.97 | 1.01 | 0.98 |
| YDR058C   | YCL055W | 1.00 | 0.98 | 0.98 |
| YGR194C   | YMR020W | 0.98 | 0.98 | 0.98 |
| YDL076C   | YDR281C | 0.96 | 1.01 | 0.98 |
| YLR250W   | YGL067W | 0.97 | 0.98 | 0.98 |
| YOL049W   | YOR087W | 0.97 | 1.00 | 0.98 |
| YJL071W   | YJR092W | 0.99 | 1.00 | 0.98 |
| YOR253W   | YKL067W | 0.99 | 0.99 | 0.98 |
| YDR057W   | YHL022C | 1.00 | 1.00 | 0.98 |
| YJR010C-A | YGL175C | 1.00 | 0.96 | 0.98 |
| YDL135C   | YGR196C | 0.98 | 0.99 | 0.98 |
| YGL090W   | YKL130C | 0.99 | 1.01 | 0.98 |
| YIR017C   | YBR272C | 0.99 | 0.99 | 0.98 |
| YER149C   | YGL121C | 0.99 | 1.00 | 0.98 |
| YAL002W   | YDR481C | 0.93 | 1.01 | 0.98 |
| YMR044W   | YJR094C | 0.98 | 0.97 | 0.99 |
| YBR228W   | YLR135W | 0.96 | 1.00 | 0.99 |
| YER180C   | YOR132W | 0.99 | 0.97 | 0.99 |
| YDL077C   | YLR151C | 0.96 | 0.99 | 0.99 |
| YJR135C   | YOR184W | 0.98 | 1.01 | 0.99 |
| YGR217W   | YLR292C | 1.01 | 1.00 | 0.99 |
| YPR073C   | YGL017W | 0.98 | 1.00 | 0.99 |
| YGR244C   | YGR044C | 0.99 | 1.00 | 0.99 |
| YOR126C   | YDR073W | 1.01 | 1.02 | 0.99 |
| YFL027C   | YBR176W | 0.99 | 1.01 | 0.99 |
| YIL132C   | YPR167C | 0.98 | 0.98 | 0.99 |
| YJL146W   | YOR202W | 1.01 | 0.99 | 1.00 |
| YHL030W   | YCR020C | 0.99 | 1.03 | 1.00 |
| YDR179C   | YBR083W | 0.99 | 1.04 | 1.01 |
| YMR065W   | YKL184W | 0.99 | 0.98 | 1.01 |
| YIL037C   | YKL025C | 0.95 | 1.02 | 1.01 |
| YPL111W   | YLR084C | 1.03 | 1.02 | 1.02 |
| YKR056W   | YJL100W | 1.01 | 1.01 | 1.02 |
| YMR036C   | YNL212W | 1.03 | 1.04 | 1.08 |
